# Supplementary material for: Programmed magnetic manipulation of vesicles into spatially coded prototissue architectures arrays
Source: PubMed Central journal article supplement (PMC6957477; doi:10.1038/s41467-019-14141-x), 2020-01-13
Supplement: 41467_2019_14141_MOESM4_ESM.pdf [file 41467_2019_14141_MOESM4_ESM.pdf]

**Title: Supplementary Movie 1.**

**Description:** Monitoring of one GUVs colony composed of gGUVs and rGUVs with time.
